# Supplementary material for: Chamigrane Sesquiterpenes from a Basidiomycetous Endophytic Fungus XG8D Associated with Thai Mangrove Xylocarpus granatum
Source: PubMed Central journal article supplement (PMC4962022; doi:10.3390/md14070132), 2016-07-15
Supplement: marinedrugs-14-00132-s001.pdf [file marinedrugs-14-00132-s001.pdf]

# Supplementary Materials: Chamigrane Sesquiterpenes from a Basidiomycetous Endophytic Fungus XG8D Associated with Thai Mangrove *Xylocarpus granatum*

Siwattra Choodej, Thapong Teerawatananond, Tohru Mitsunaga and Khanitha Pudhom

| Figure     | Description                                                                                       | Page |
|------------|---------------------------------------------------------------------------------------------------|------|
| Figure S1  | <sup>1</sup> H NMR spectrum (CDCl <sub>3</sub> ) of Merulinol A (1)                               | S2   |
| Figure S2  | <sup>13</sup> C NMR spectrum (CDCl <sub>3</sub> ) of Merulinol A (1)                              | S2   |
| Figure S3  | <sup>1</sup> H- <sup>1</sup> H COSY spectrum (CDCl <sub>3</sub> ) of Merulinol A (1)              | S3   |
| Figure S4  | HSQC spectrum (CDCl <sub>3</sub> ) of Merulinol A (1)                                             | S3   |
| Figure S5  | HMBC spectrum (CDCl <sub>3</sub> ) of Merulinol A (1)                                             | S4   |
| Figure S6  | <sup>1</sup> H NMR spectrum (acetone- <i>d</i> <sub>6</sub> ) of Merulinol B (2)                  | S4   |
| Figure S7  | <sup>13</sup> C NMR spectrum (acetone- <i>d</i> <sub>6</sub> ) of Merulinol B (2)                 | S5   |
| Figure S8  | <sup>1</sup> H- <sup>1</sup> H COSY spectrum (acetone- <i>d</i> <sub>6</sub> ) of Merulinol B (2) | S5   |
| Figure S9  | HSQC spectrum (acetone- <i>d</i> <sub>6</sub> ) of Merulinol B (2)                                | S6   |
| Figure S10 | HMBC spectrum (acetone- <i>d</i> <sub>6</sub> ) of Merulinol B (2)                                | S6   |
| Figure S11 | NOESY spectrum (acetone- <i>d</i> <sub>6</sub> ) of Merulinol B (2)                               | S7   |
| Figure S12 | <sup>1</sup> H NMR spectrum (CDCl <sub>3</sub> ) of Merulinol C (3)                               | S7   |
| Figure S13 | <sup>13</sup> C NMR spectrum (CDCl <sub>3</sub> ) of Merulinol C (3)                              | S8   |
| Figure S14 | <sup>1</sup> H- <sup>1</sup> H COSY spectrum (CDCl <sub>3</sub> ) of Merulinol C (3)              | S8   |
| Figure S15 | HSQC spectrum (CDCl <sub>3</sub> ) of Merulinol C (3)                                             | S9   |
| Figure S16 | HMBC spectrum (CDCl <sub>3</sub> ) of Merulinol C (3)                                             | S9   |
| Figure S17 | NOESY spectrum (CDCl <sub>3</sub> ) of Merulinol C (3)                                            | S10  |
| Figure S18 | <sup>1</sup> H NMR spectrum (CDCl <sub>3</sub> ) of Merulinol D (4)                               | S10  |
| Figure S19 | <sup>13</sup> C NMR spectrum (CDCl <sub>3</sub> ) of Merulinol D (4)                              | S11  |
| Figure S20 | <sup>1</sup> H- <sup>1</sup> H COSY spectrum (CDCl <sub>3</sub> ) of Merulinol D (4)              | S11  |
| Figure S21 | HSQC spectrum (CDCl <sub>3</sub> ) of Merulinol D (4)                                             | S12  |
| Figure S22 | HMBC spectrum (CDCl <sub>3</sub> ) of Merulinol D (4)                                             | S12  |
| Figure S23 | NOESY spectrum (CDCl <sub>3</sub> ) of Merulinol D (4)                                            | S13  |
| Figure S24 | <sup>1</sup> H NMR spectrum (CDCl <sub>3</sub> ) of Merulinol E (5)                               | S13  |
| Figure S25 | <sup>13</sup> C NMR spectrum (CDCl <sub>3</sub> ) of Merulinol E (5)                              | S14  |
| Figure S26 | <sup>1</sup> H- <sup>1</sup> H COSY spectrum (CDCl <sub>3</sub> ) of Merulinol E (5)              | S14  |
| Figure S27 | HSQC spectrum (CDCl <sub>3</sub> ) of Merulinol E (5)                                             | S15  |
| Figure S28 | HMBC spectrum (CDCl <sub>3</sub> ) of Merulinol E (5)                                             | S15  |
| Figure S29 | NOESY spectrum (CDCl <sub>3</sub> ) of Merulinol E (5)                                            | S16  |
| Figure S30 | <sup>1</sup> H NMR spectrum (CDCl <sub>3</sub> ) of Merulinol F (6)                               | S16  |
| Figure S31 | <sup>13</sup> C NMR spectrum (CDCl <sub>3</sub> ) of Merulinol F (6)                              | S17  |
| Figure S32 | <sup>1</sup> H- <sup>1</sup> H COSY spectrum (CDCl <sub>3</sub> ) of Merulinol F (6)              | S17  |
| Figure S33 | HSQC spectrum (CDCl <sub>3</sub> ) of Merulinol F (6)                                             | S18  |
| Figure S34 | HMBC spectrum (CDCl <sub>3</sub> ) of Merulinol F (6)                                             | S18  |

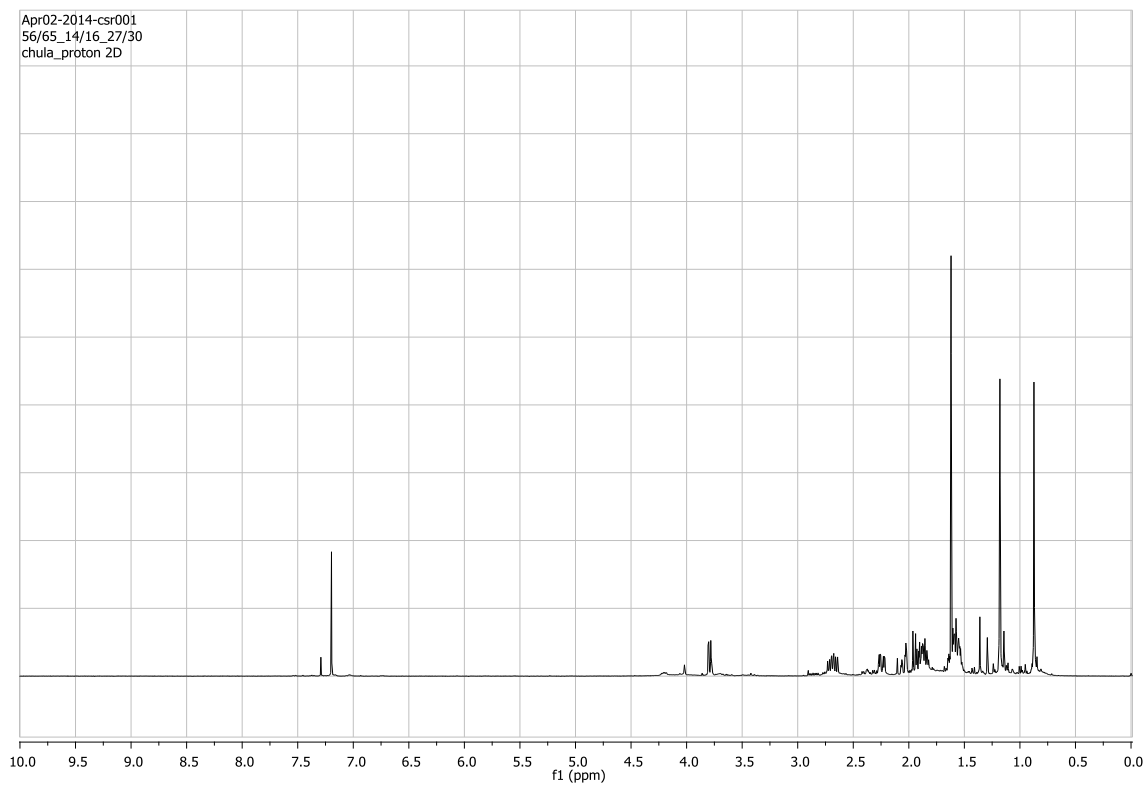

Figure S1.  $^1\text{H}$  NMR spectrum ( $\text{CDCl}_3$ ) of Merulinol A (1).

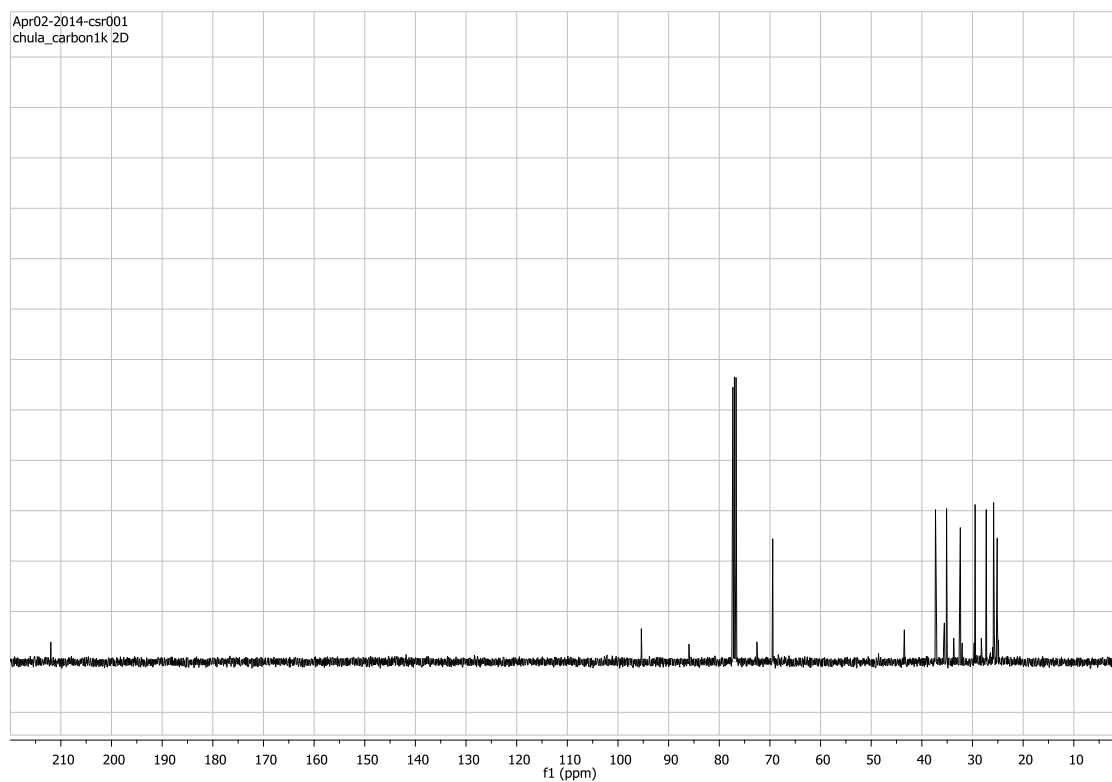

Figure S2.  $^{13}\text{C}$  NMR spectrum ( $\text{CDCl}_3$ ) of Merulinol A (1).

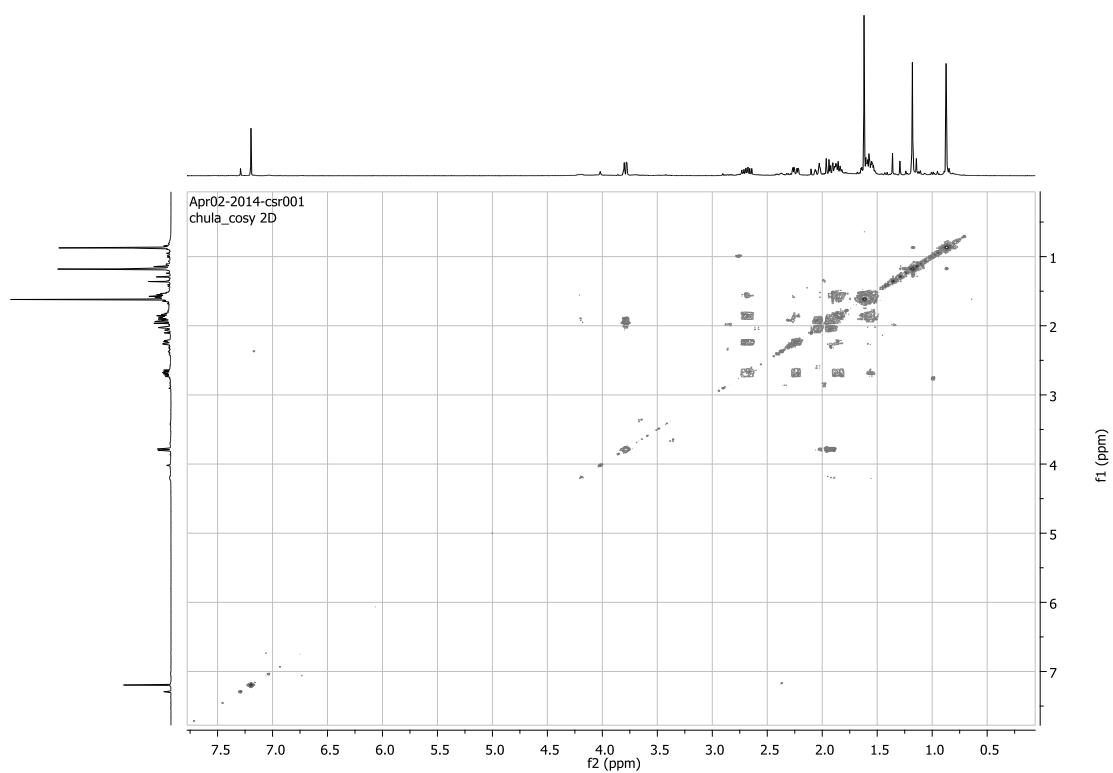

Figure S3.  $^1\text{H}$ - $^1\text{H}$  COSY spectrum ( $\text{CDCl}_3$ ) of Merulinol A (1).

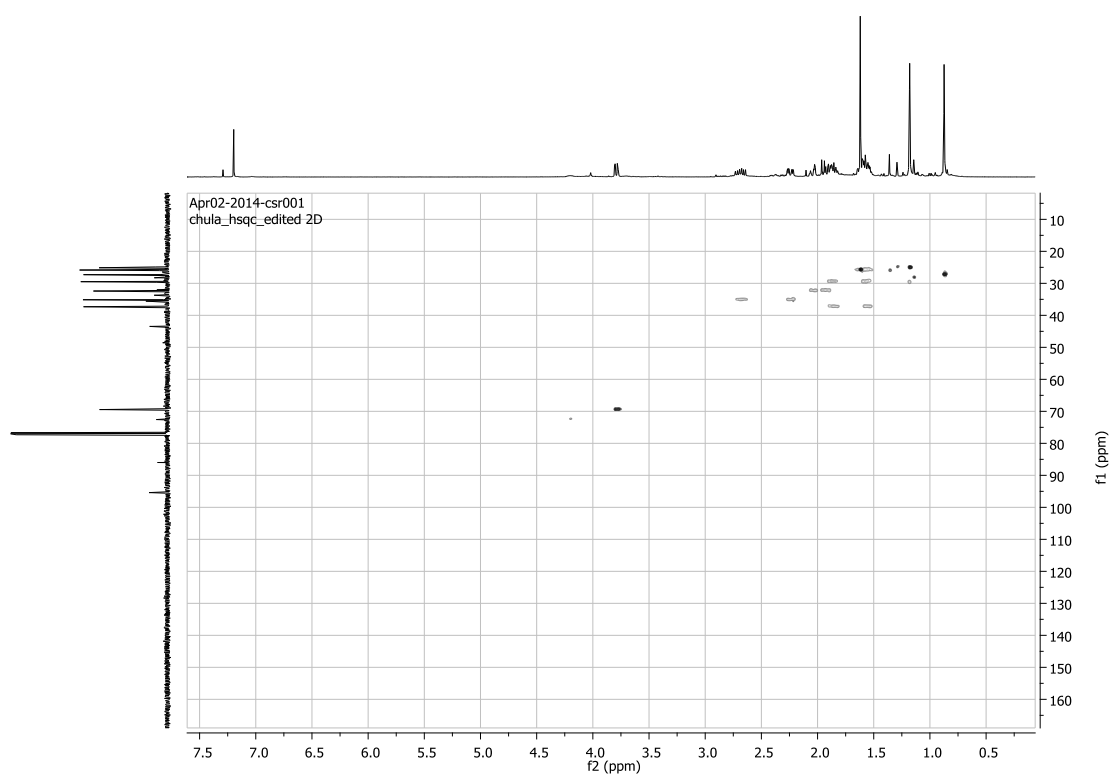

Figure S4. HSQC spectrum ( $\text{CDCl}_3$ ) of Merulinol A (1).

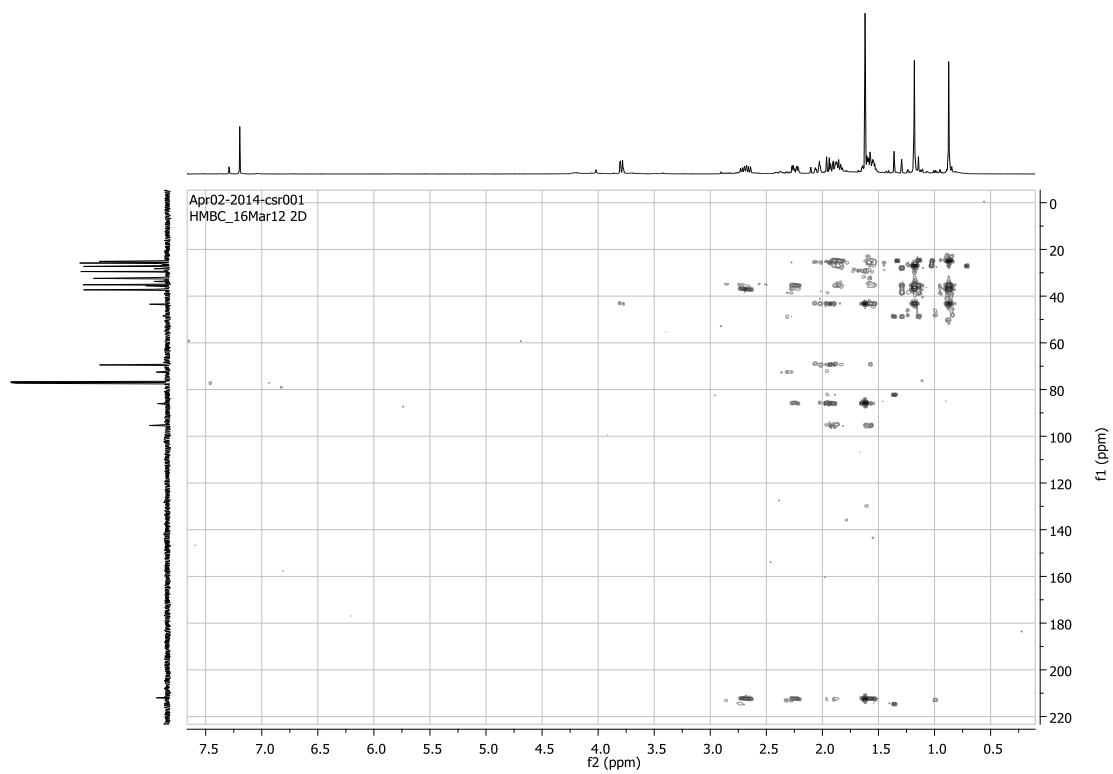

Figure S5. HMBC spectrum (CDCl<sub>3</sub>) of Merulinol A (1).

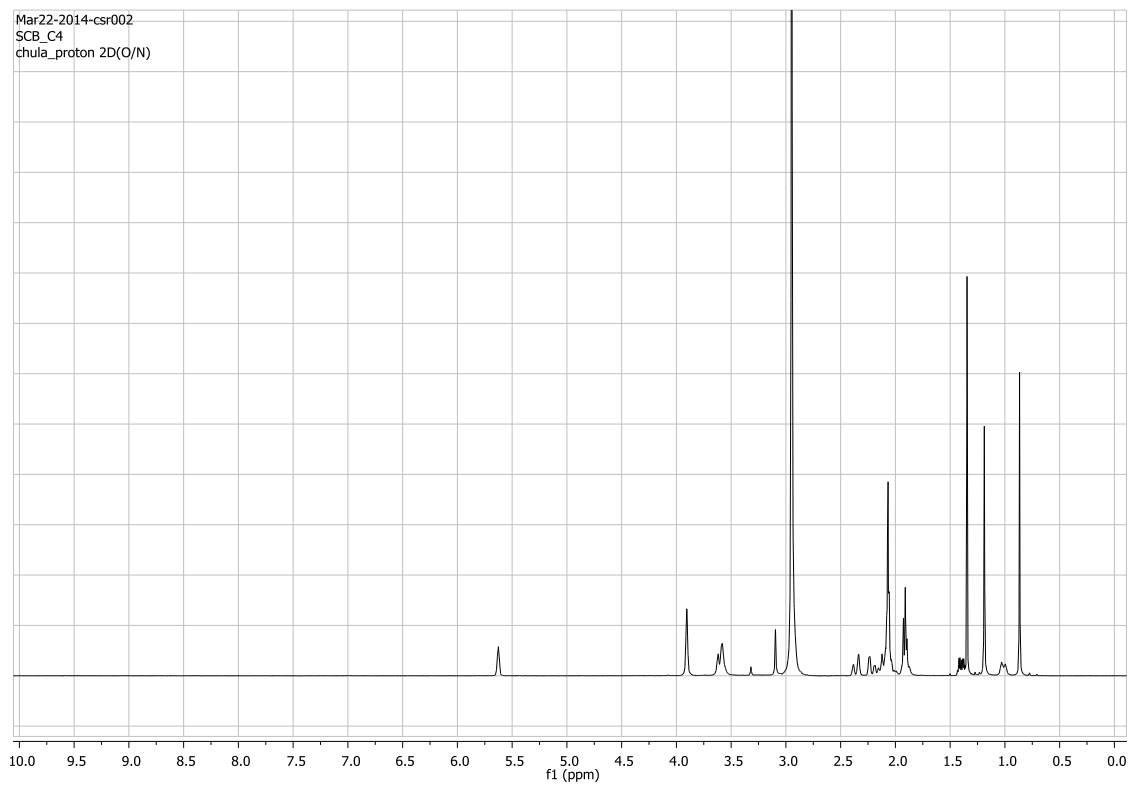

Figure S6. <sup>1</sup>H NMR spectrum (acetone-*d*<sub>6</sub>) of Merulinol B (2).

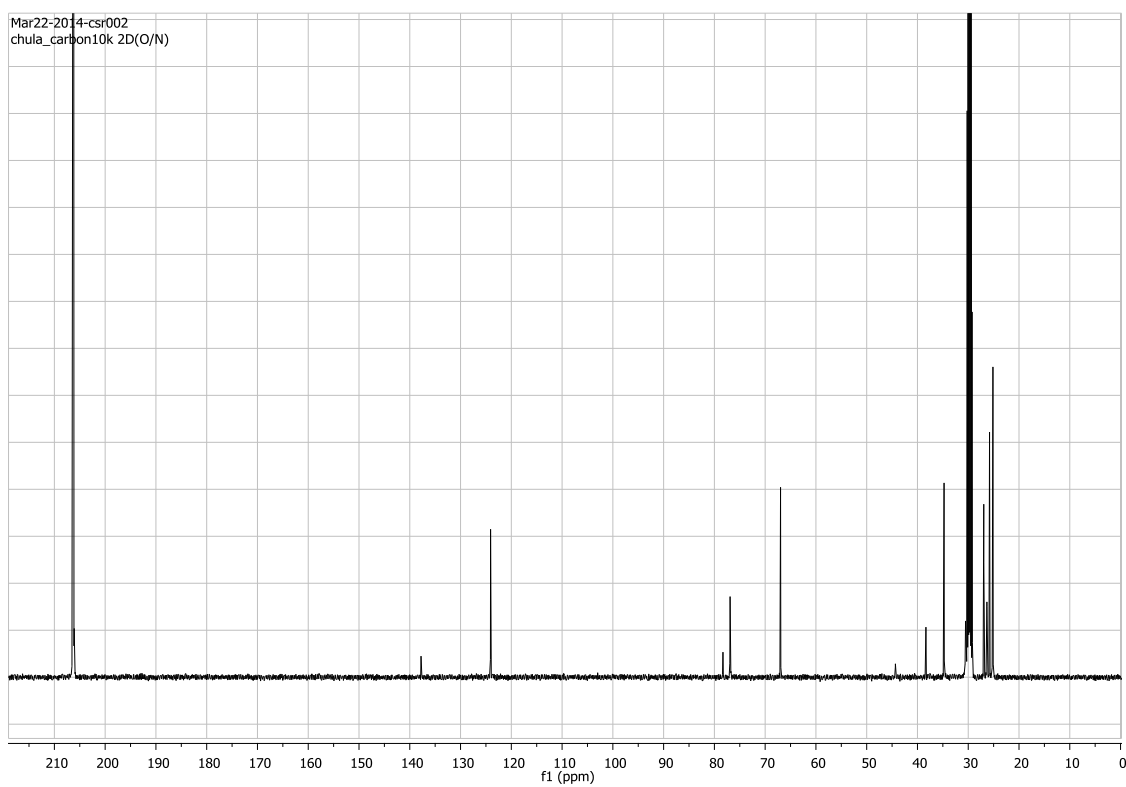

Figure S7.  $^{13}\text{C}$  NMR spectrum (acetone- $d_6$ ) of Merulinol B (2).

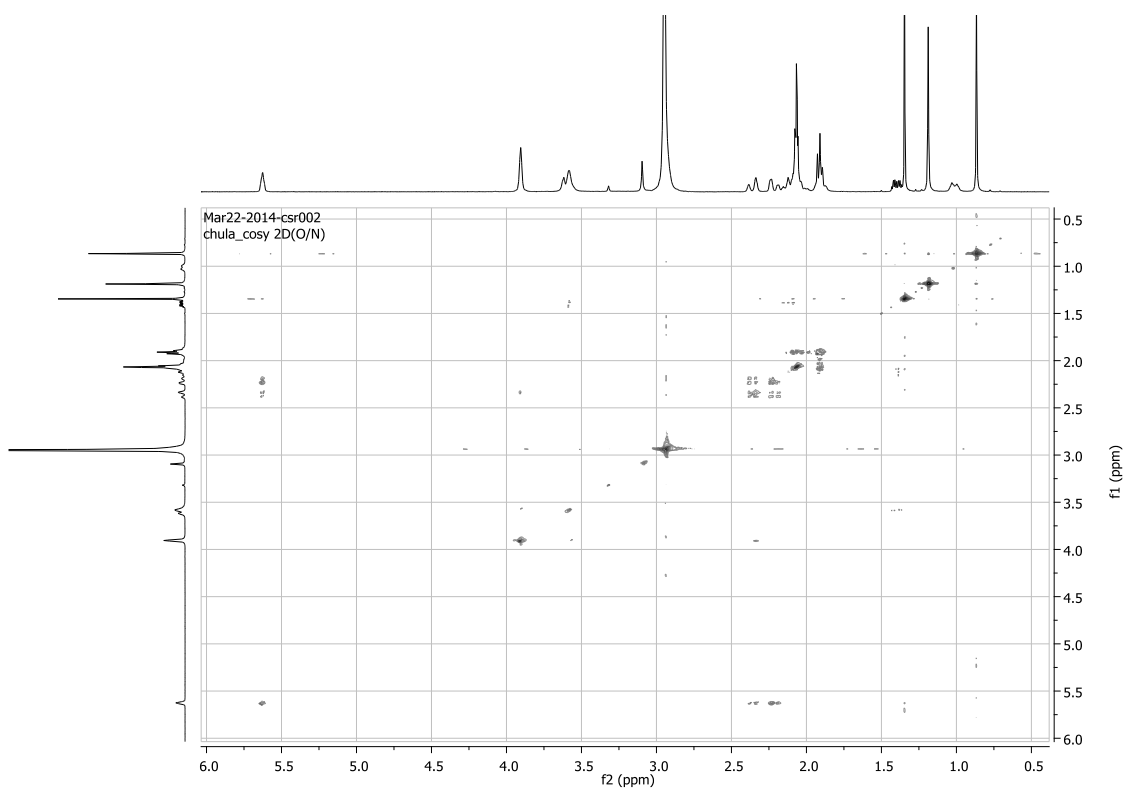

Figure S8.  $^1\text{H}$ - $^1\text{H}$  COSY spectrum (acetone- $d_6$ ) of Merulinol B (2).

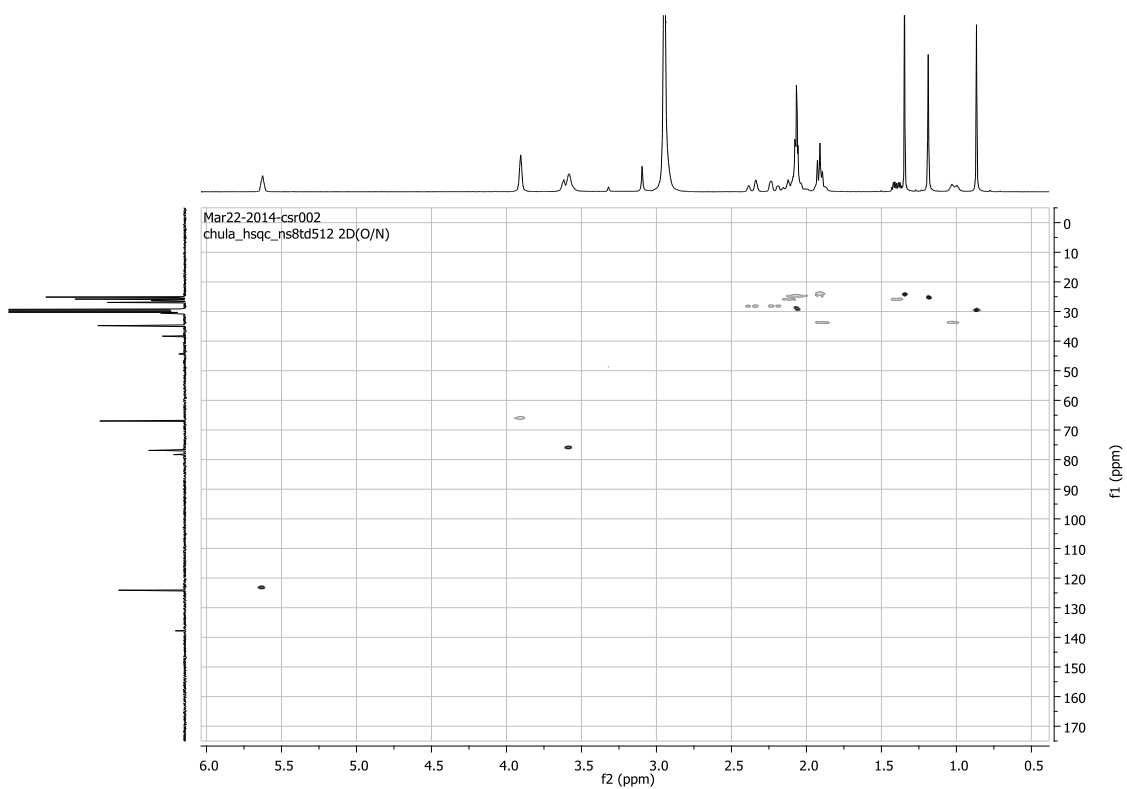

Figure S9. HSQC spectrum (acetone-*d*<sub>6</sub>) of Merulinol B (2).

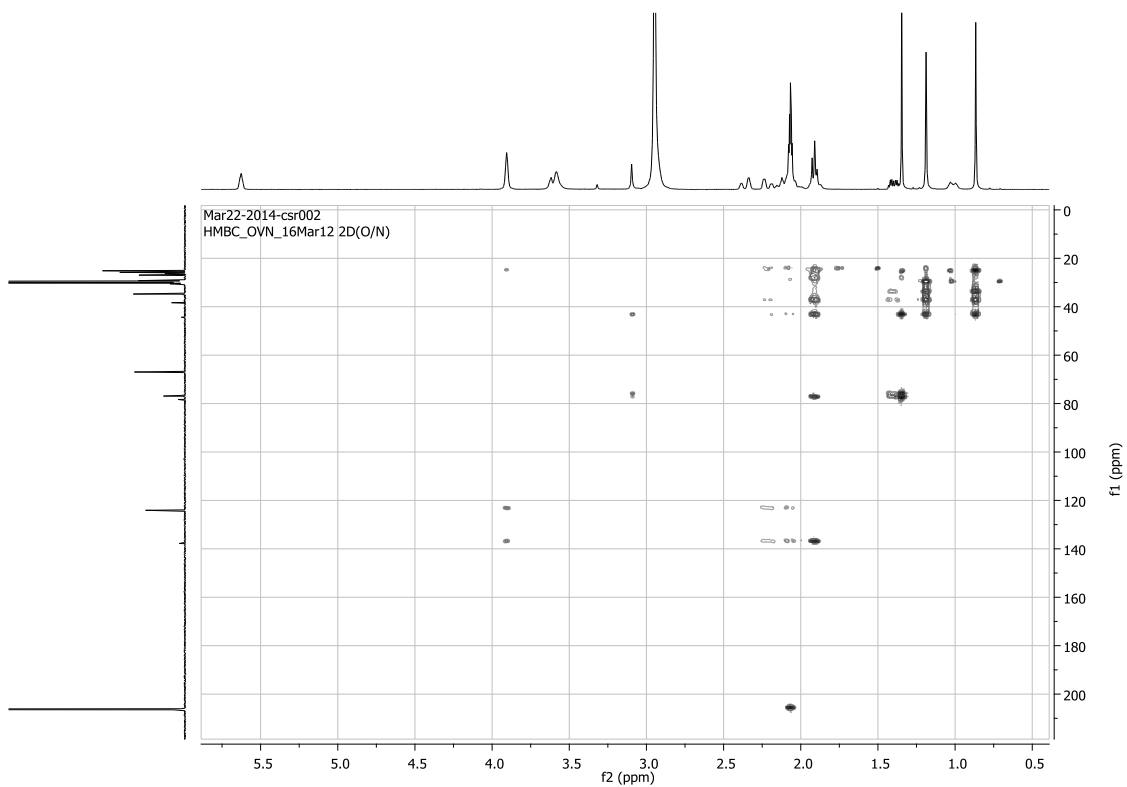

Figure S10. HMBC spectrum (acetone-*d*<sub>6</sub>) of Merulinol B (2).

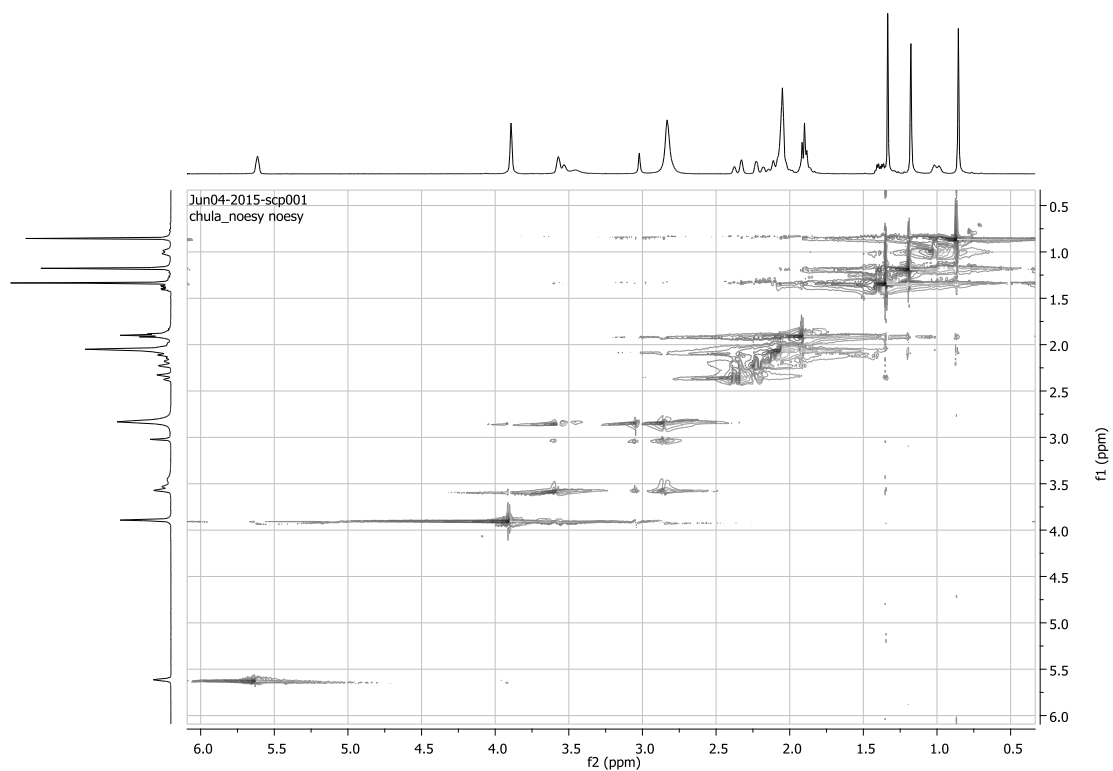

Figure S11. NOESY spectrum (acetone-*d*<sub>6</sub>) of Merulinol B (2).

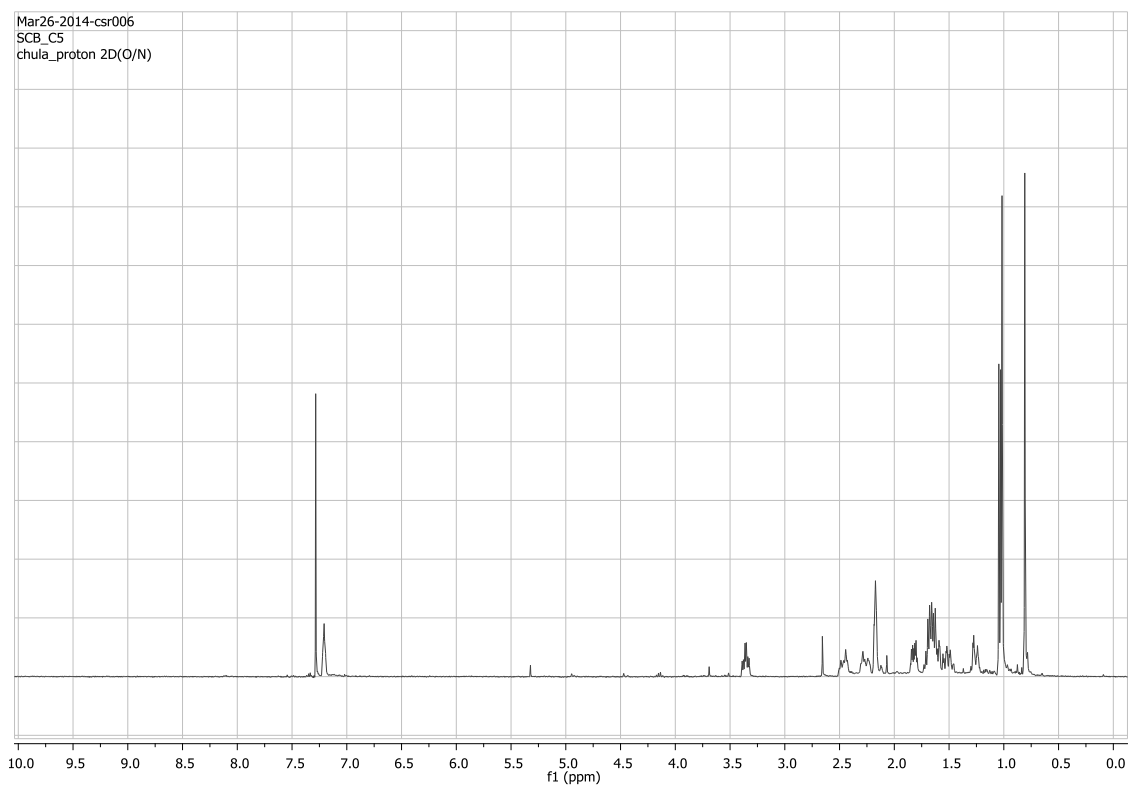

Figure S12. <sup>1</sup>H NMR spectrum (CDCl<sub>3</sub>) of Merulinol C (3).

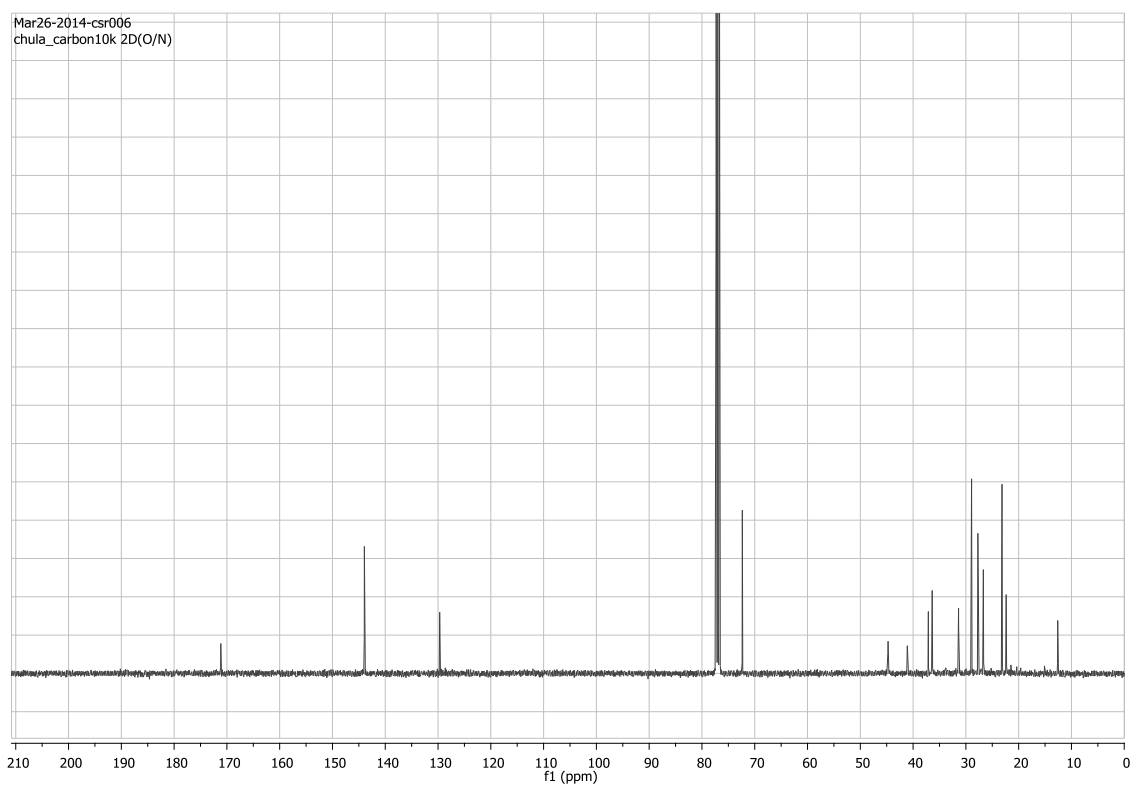

Figure S13.  $^{13}\text{C}$  NMR spectrum ( $\text{CDCl}_3$ ) of Merulinol C (3).

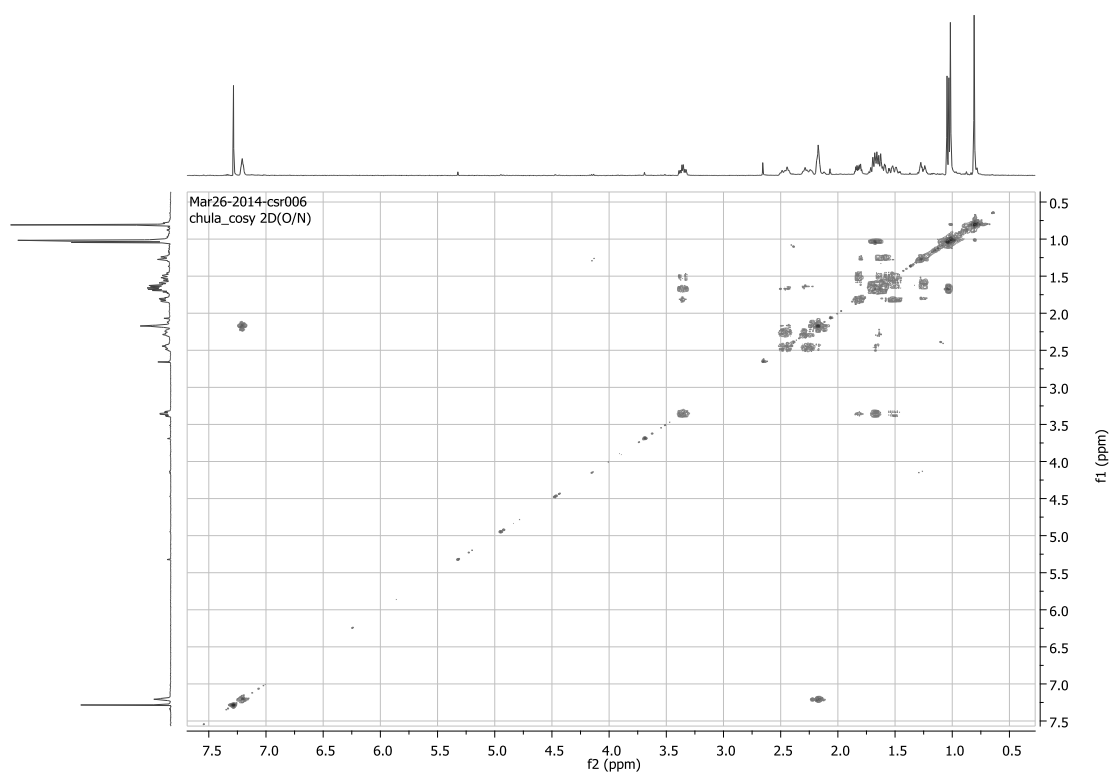

Figure S14.  $^1\text{H}$ - $^1\text{H}$  COSY spectrum ( $\text{CDCl}_3$ ) of Merulinol C (3).



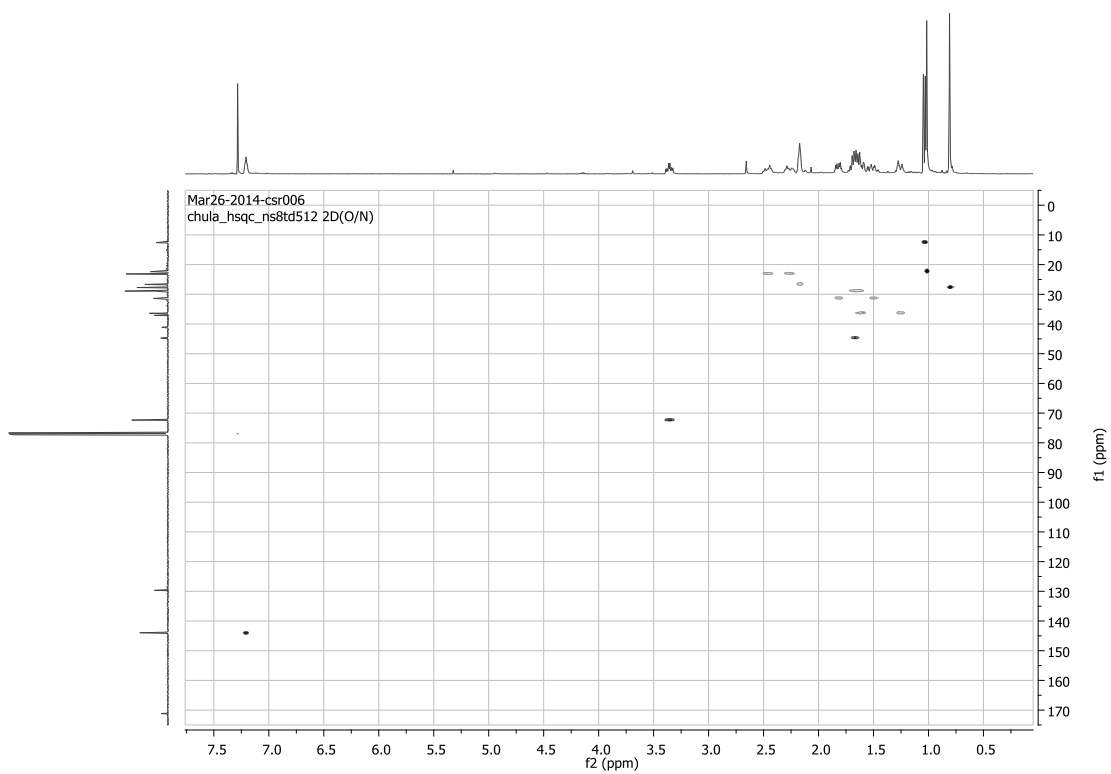

Figure S15. HSQC spectrum (CDCl<sub>3</sub>) of Merulinol C (3).

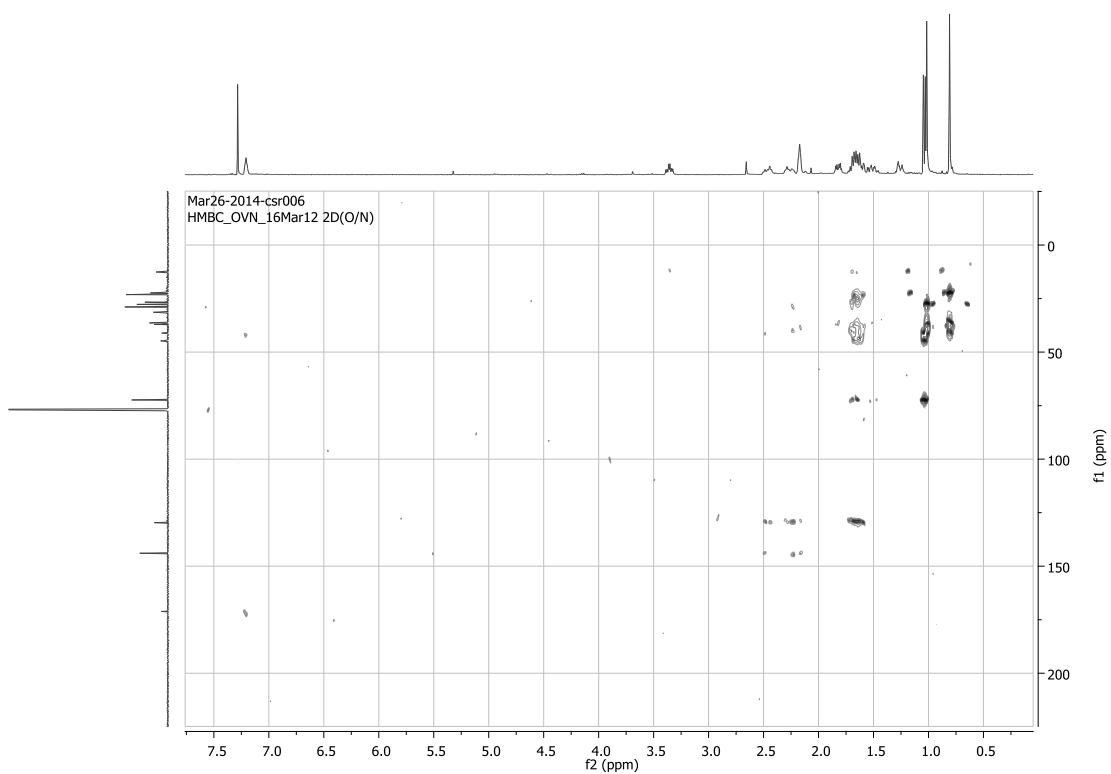

Figure S16. HMBC spectrum (CDCl<sub>3</sub>) of Merulinol C (3).

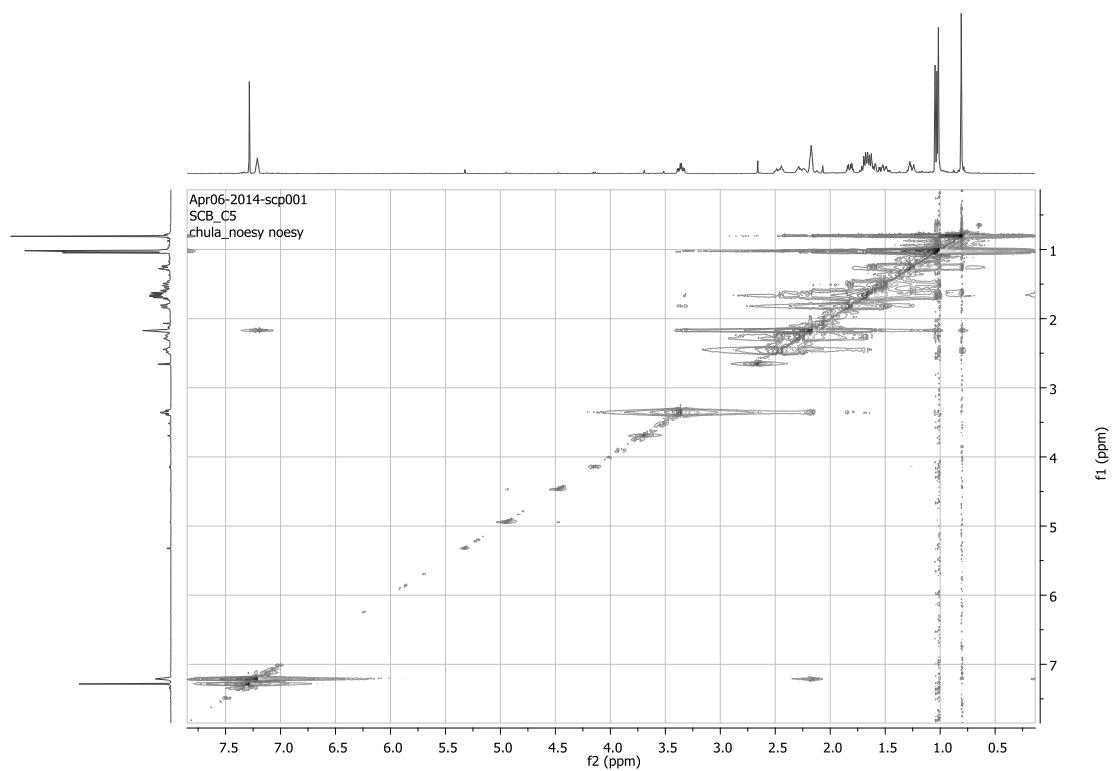

Figure S17. NOESY spectrum (CDCl<sub>3</sub>) of Merulinol C (3).

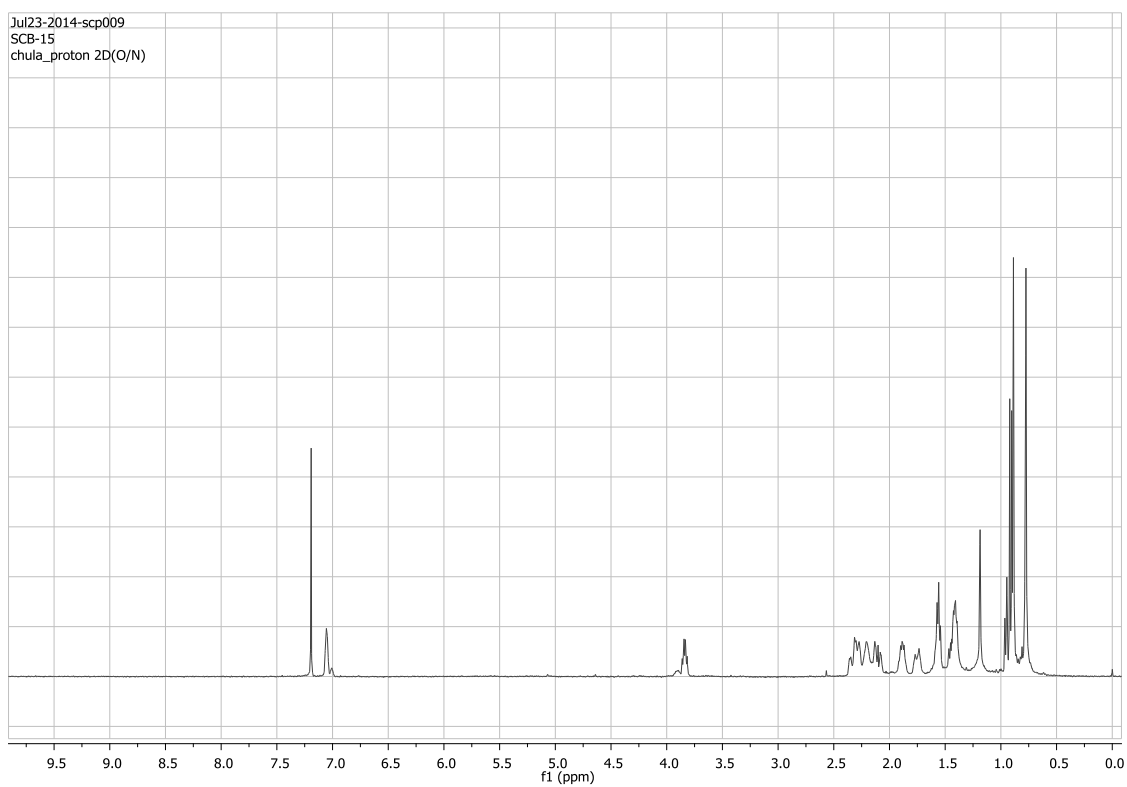

Figure S18. <sup>1</sup>H NMR spectrum (CDCl<sub>3</sub>) of Merulinol D (4).

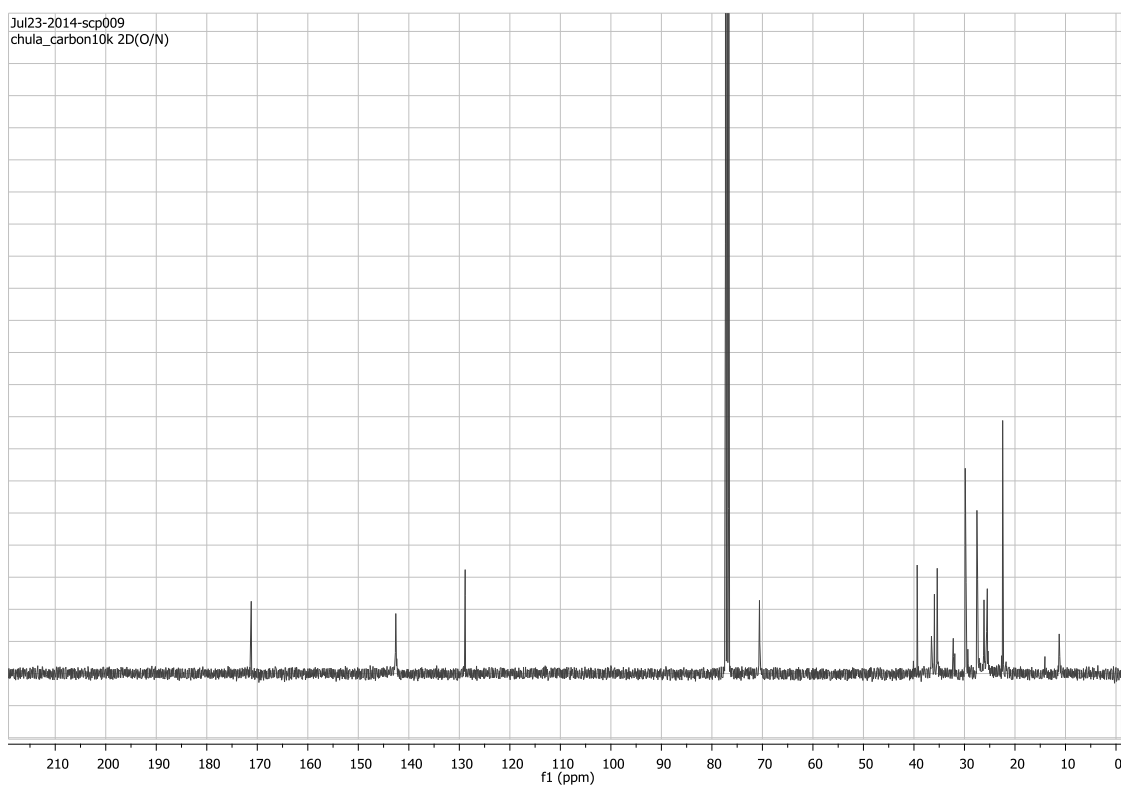

Figure S19. <sup>13</sup>C NMR spectrum (CDCl<sub>3</sub>) of Merulinol D (4).

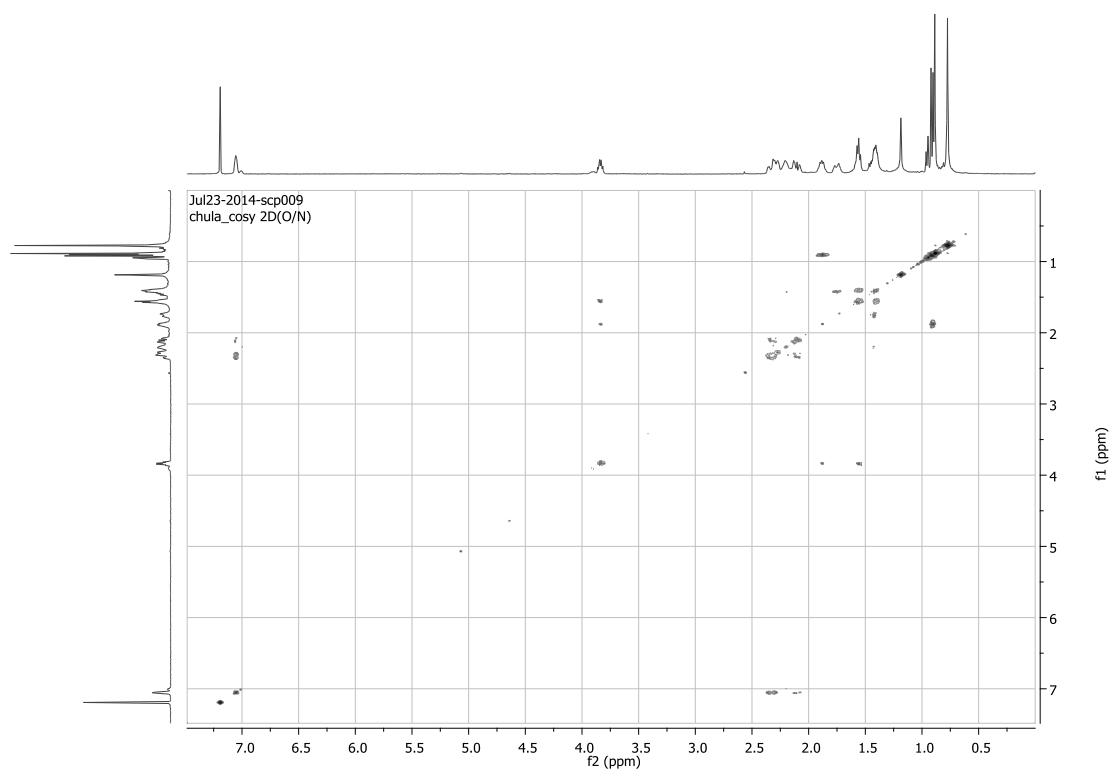

Figure S20. <sup>1</sup>H-<sup>1</sup>H COSY spectrum (CDCl<sub>3</sub>) of Merulinol D (4).

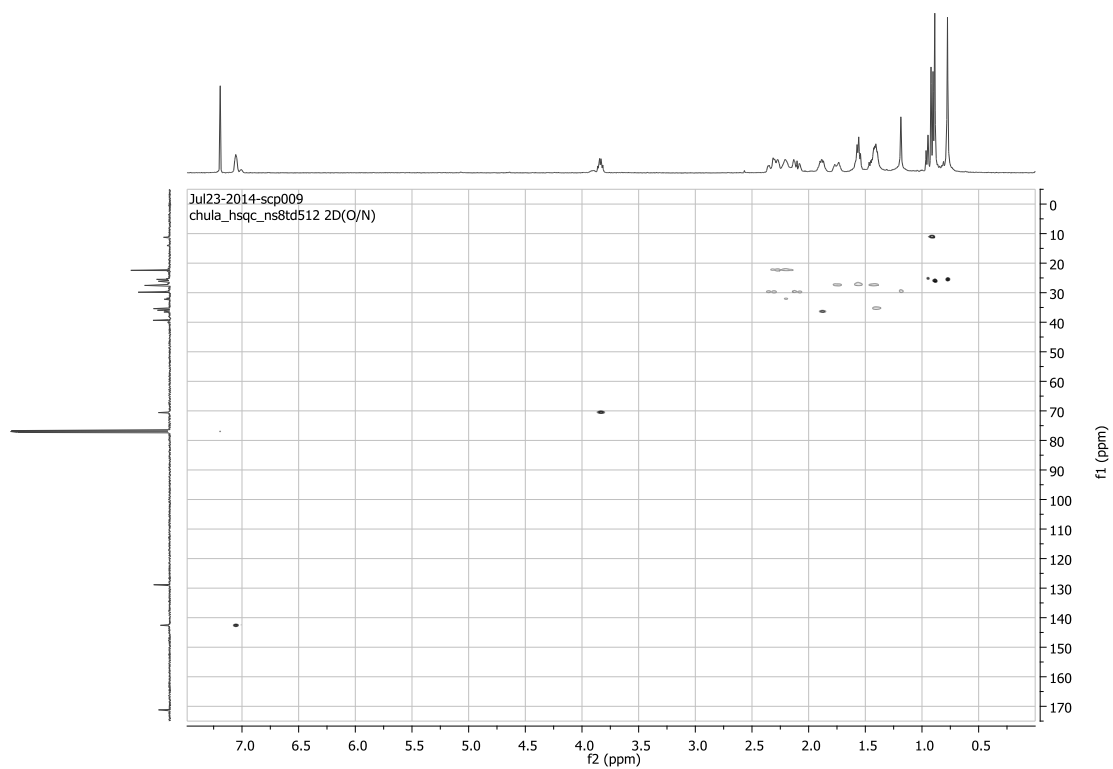

Figure S21. HSQC spectrum (CDCl<sub>3</sub>) of Merulinol D (4).

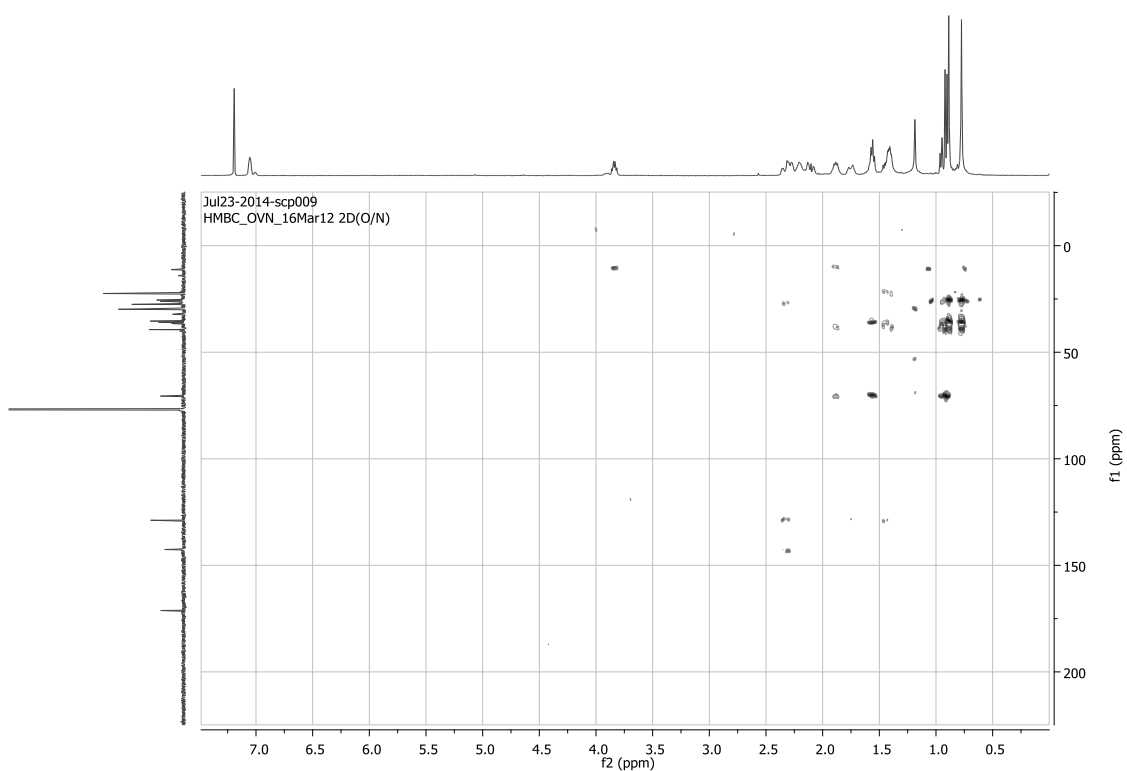

Figure S22. HMBC spectrum (CDCl<sub>3</sub>) of Merulinol D (4).

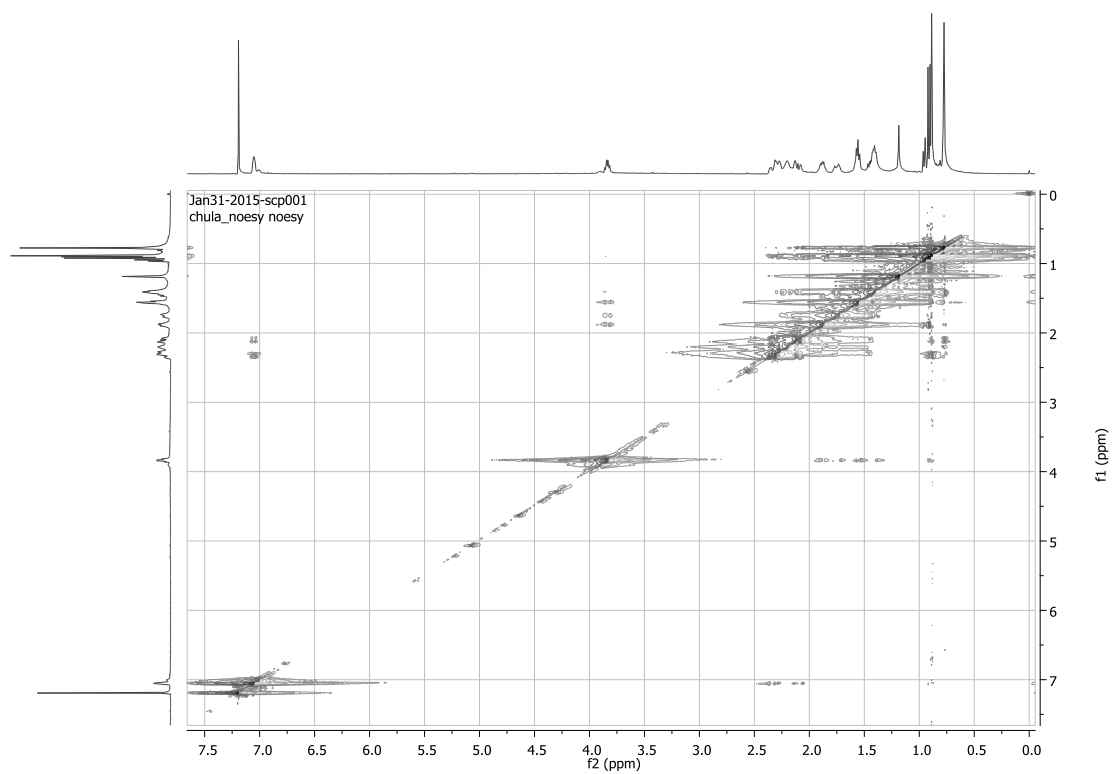

Figure S23. NOESY spectrum (CDCl<sub>3</sub>) of Merulinol D (4).

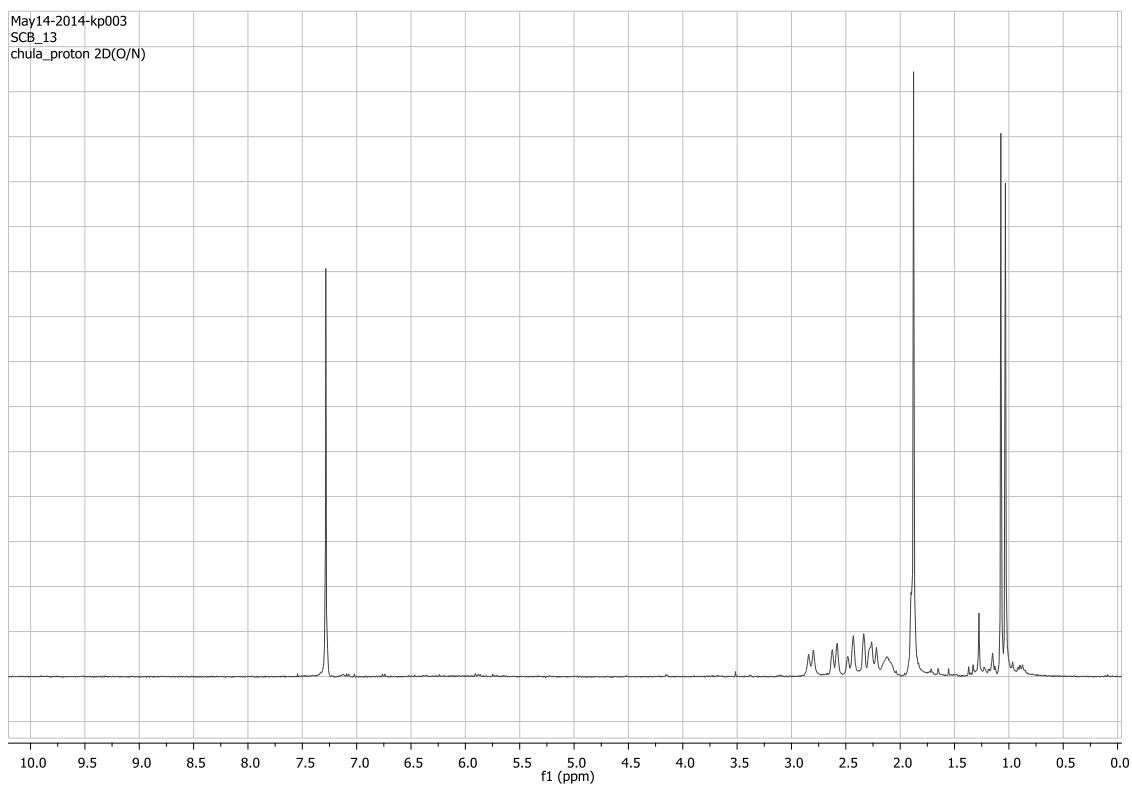

Figure S24. <sup>1</sup>H NMR spectrum (CDCl<sub>3</sub>) of Merulinol E (5).

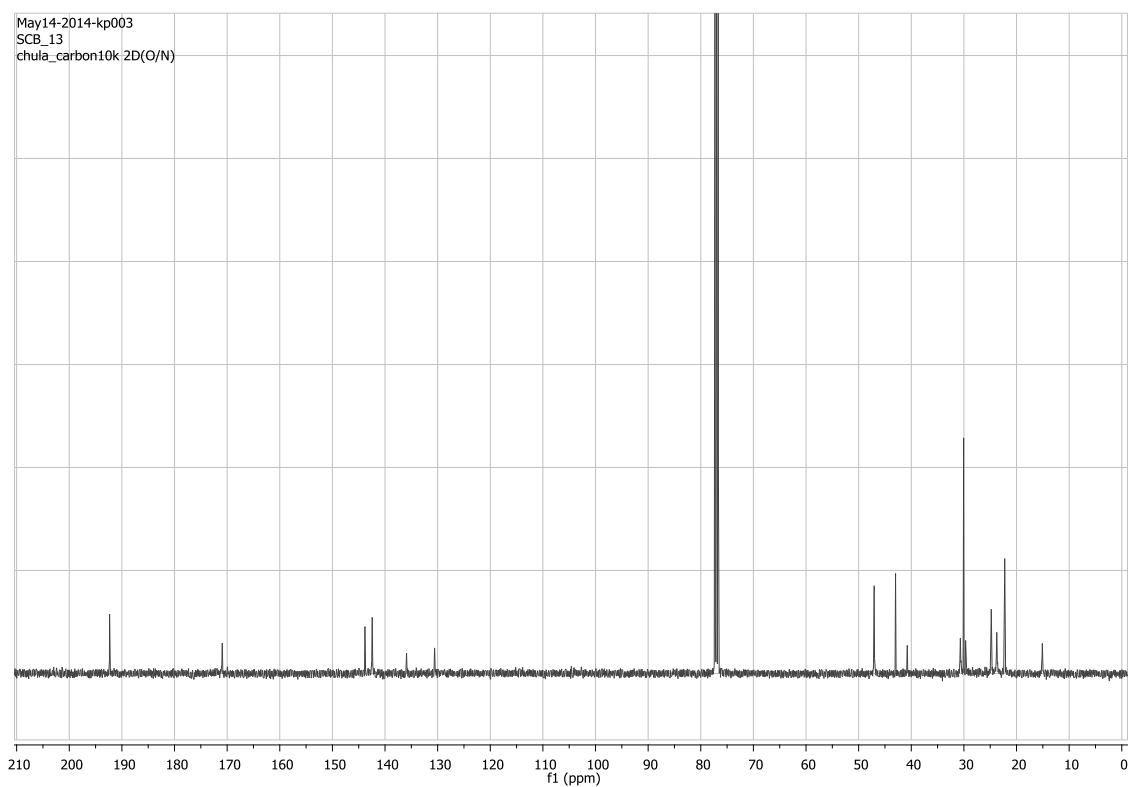

Figure S25. <sup>13</sup>C NMR spectrum (CDCl<sub>3</sub>) of Merulinol E (5).

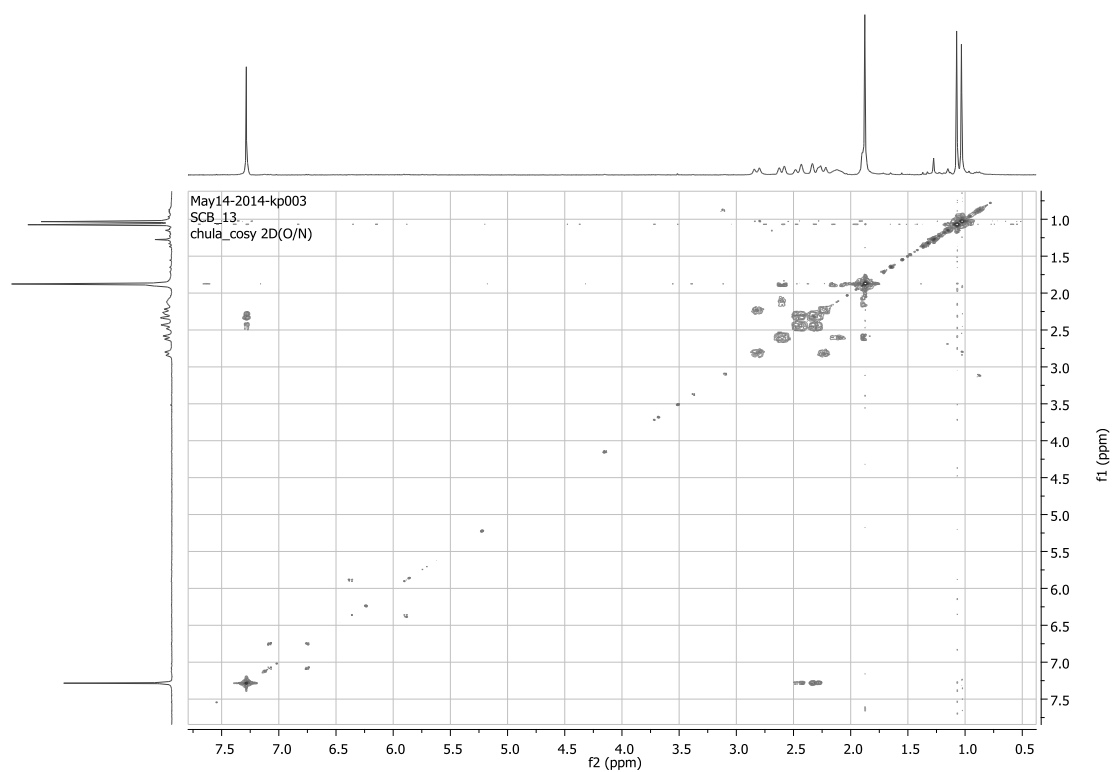

Figure S26. <sup>1</sup>H-<sup>1</sup>H COSY spectrum (CDCl<sub>3</sub>) of Merulinol E (5).

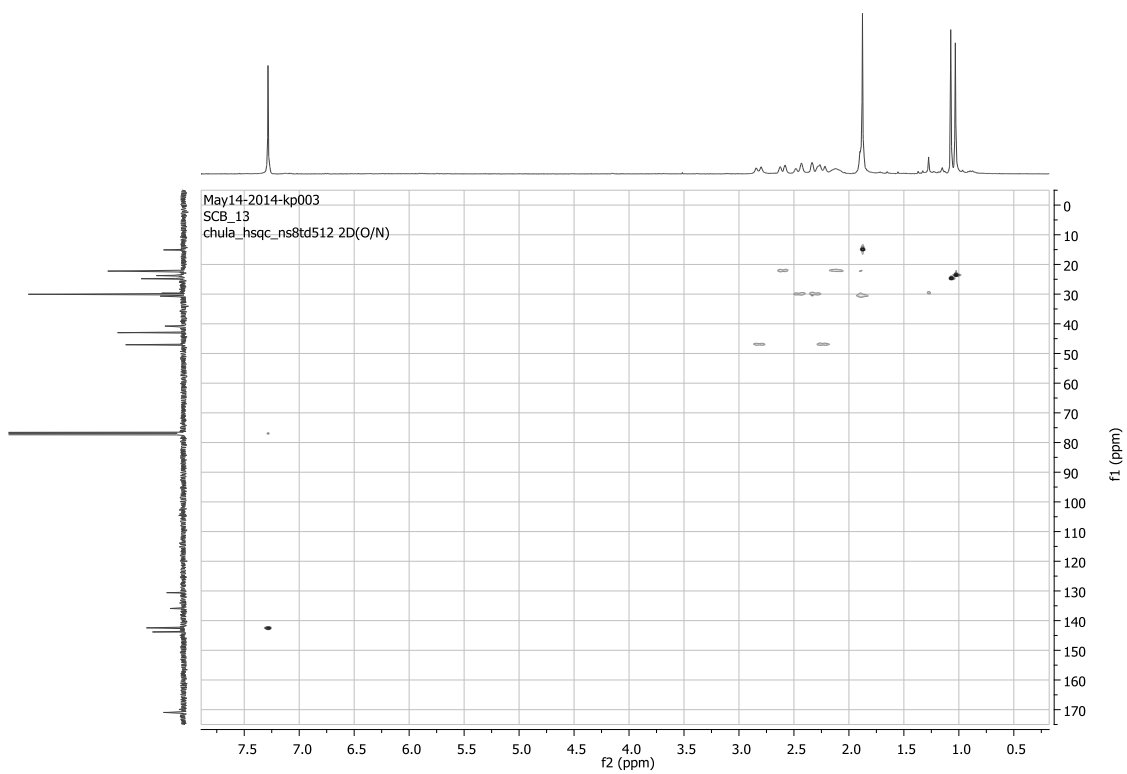

Figure S27. HSQC spectrum (CDCl<sub>3</sub>) of Merulinol E (5).

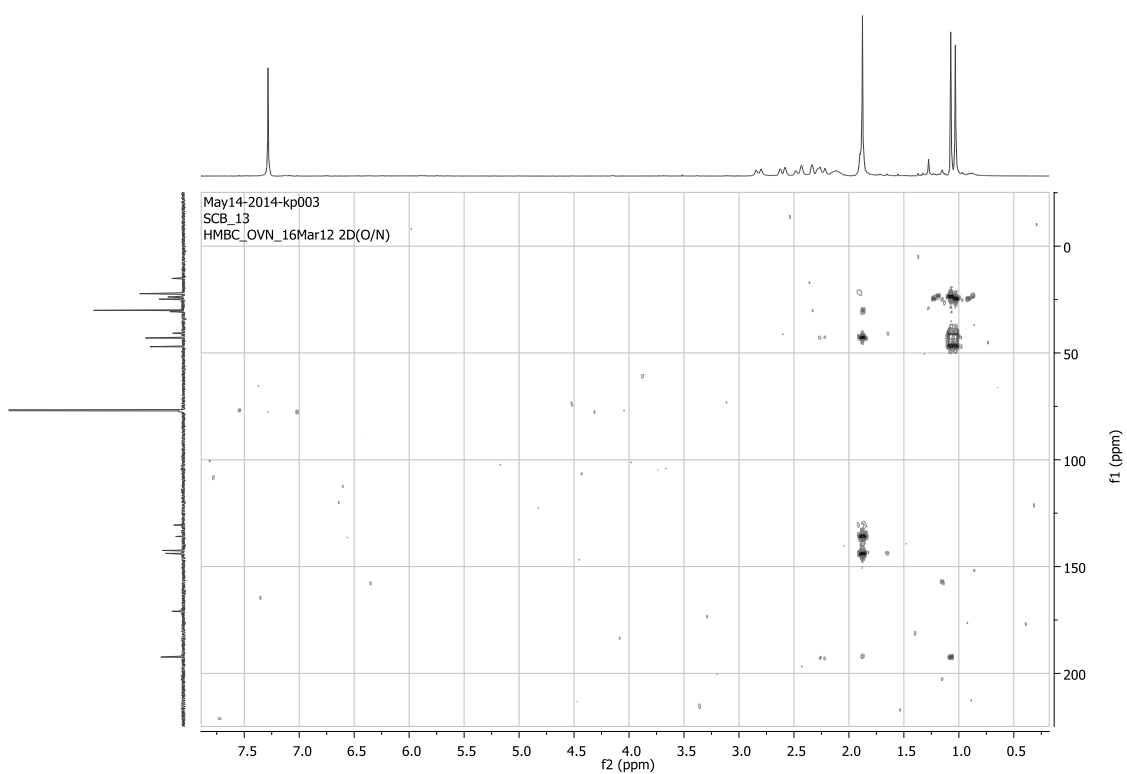

Figure S28. HMBC spectrum (CDCl<sub>3</sub>) of Merulinol E (5).

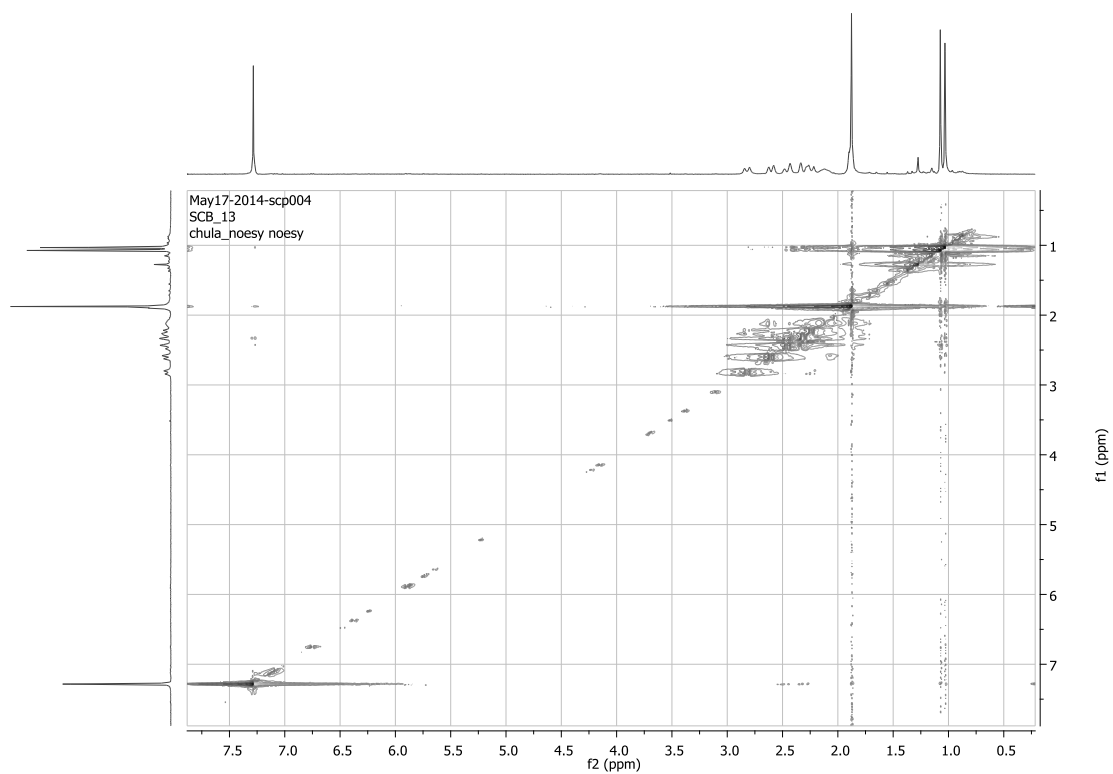

Figure S29. NOESY spectrum (CDCl<sub>3</sub>) of Merulinol E (5).

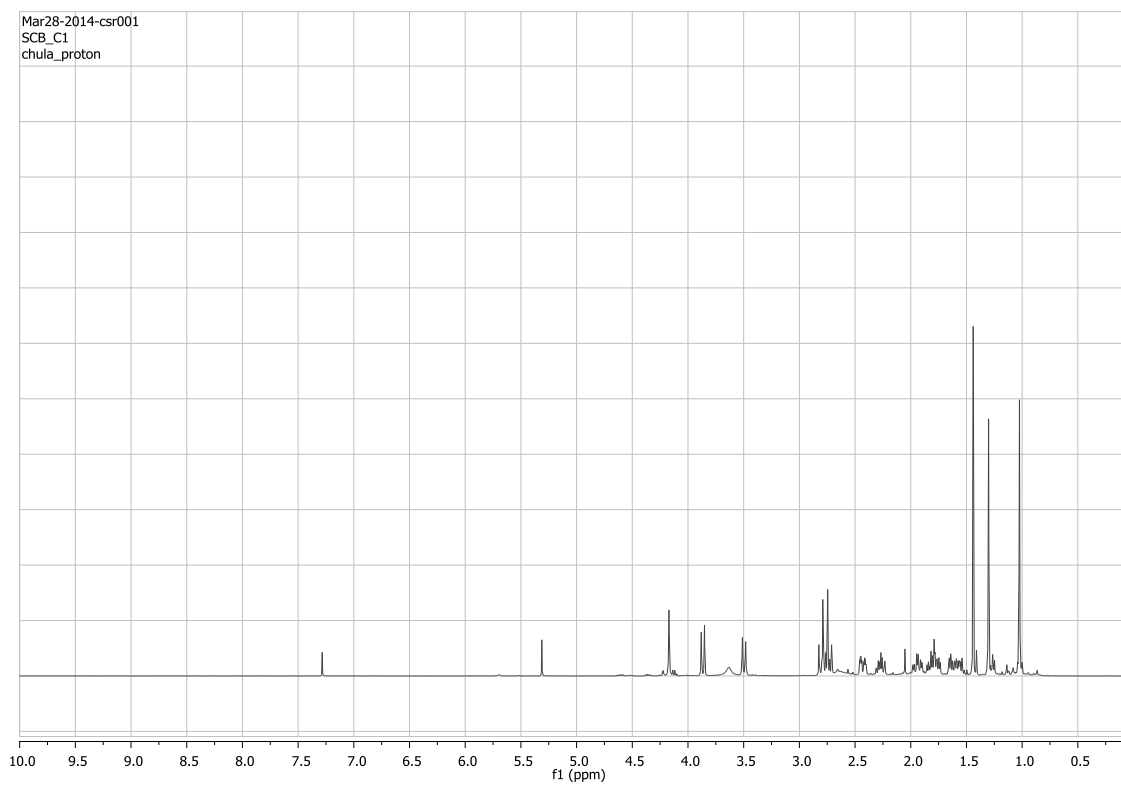

Figure S30. <sup>1</sup>H spectrum (CDCl<sub>3</sub>) of Merulinol F (6).



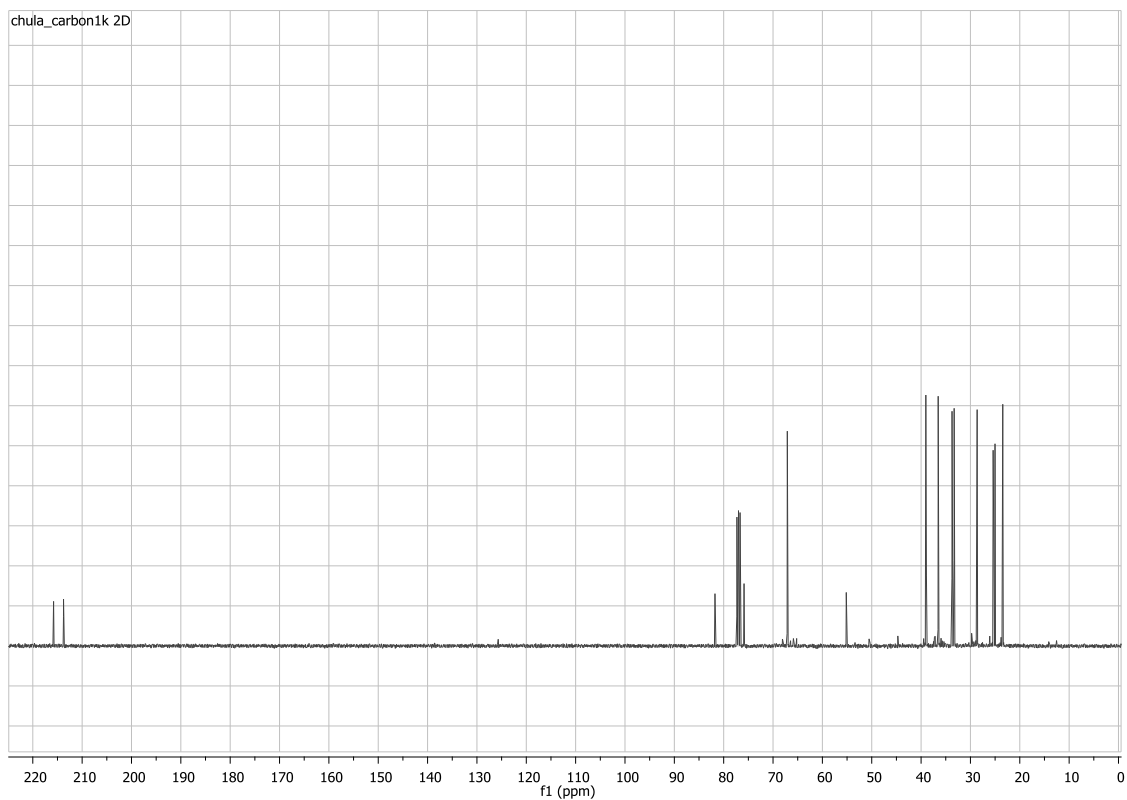

Figure S31.  $^{13}\text{C}$  spectrum ( $\text{CDCl}_3$ ) of Merulinol F (6).

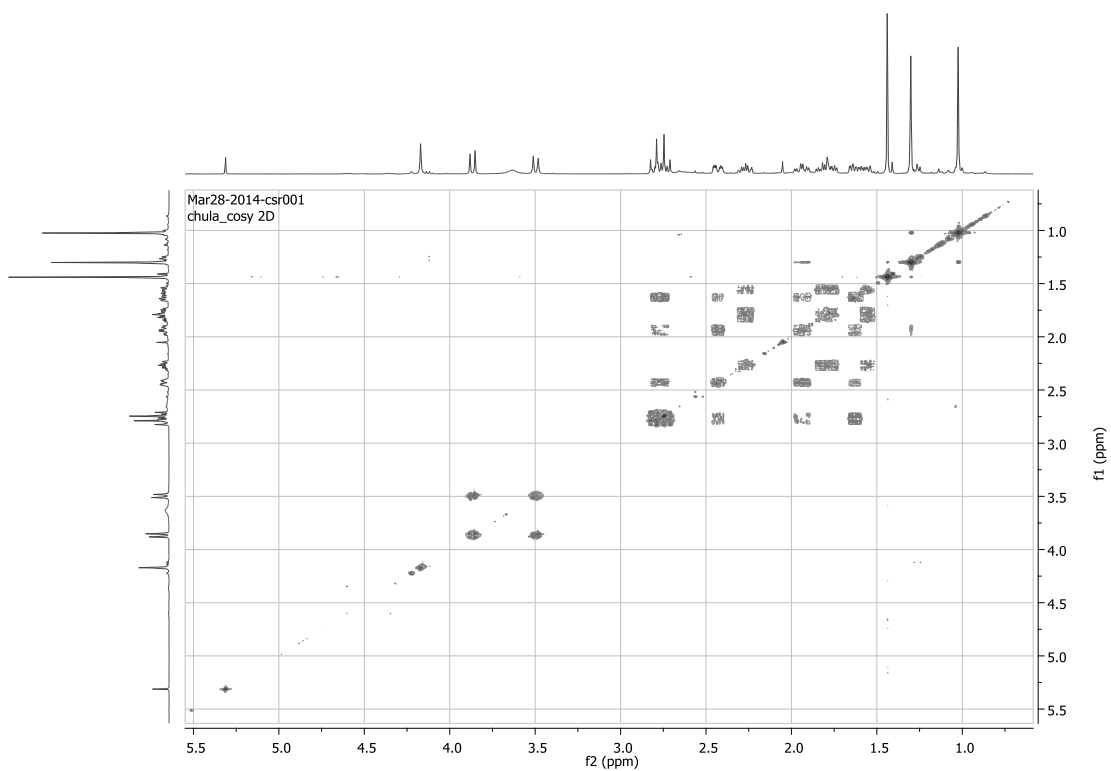

Figure S32.  $^1\text{H}$ - $^1\text{H}$  COSY spectrum ( $\text{CDCl}_3$ ) of Merulinol F (6).

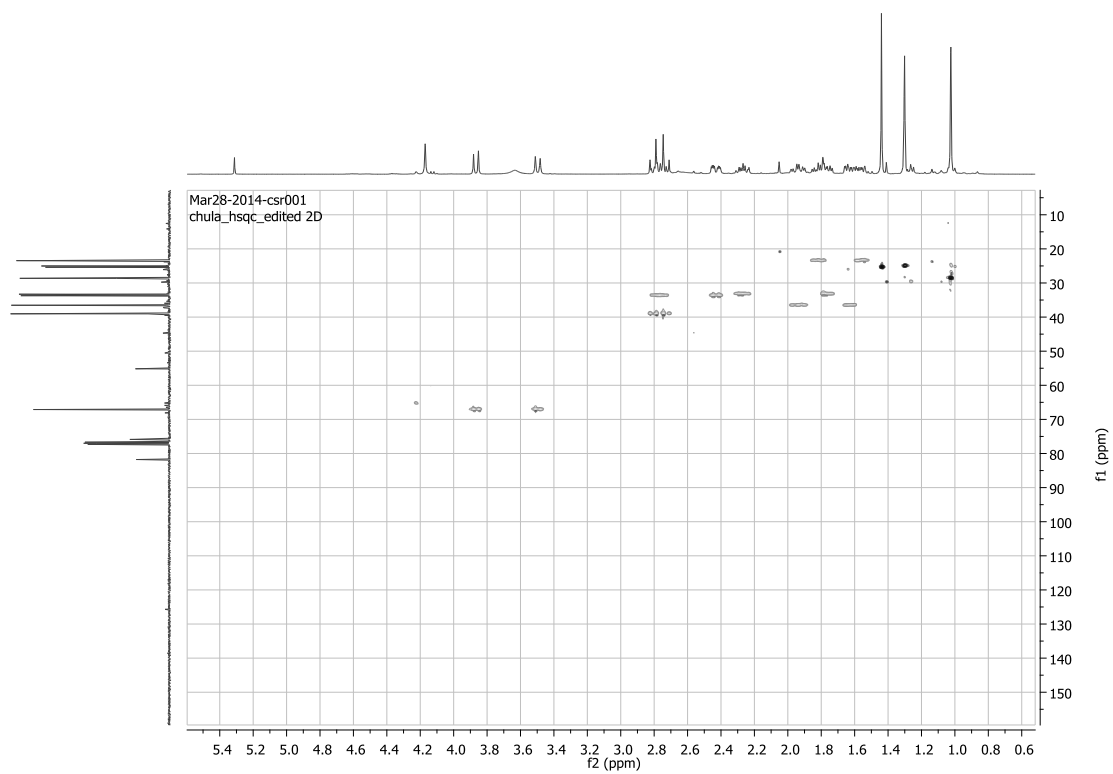

Figure S33. HSQC spectrum (CDCl<sub>3</sub>) of Merulinol F (6).

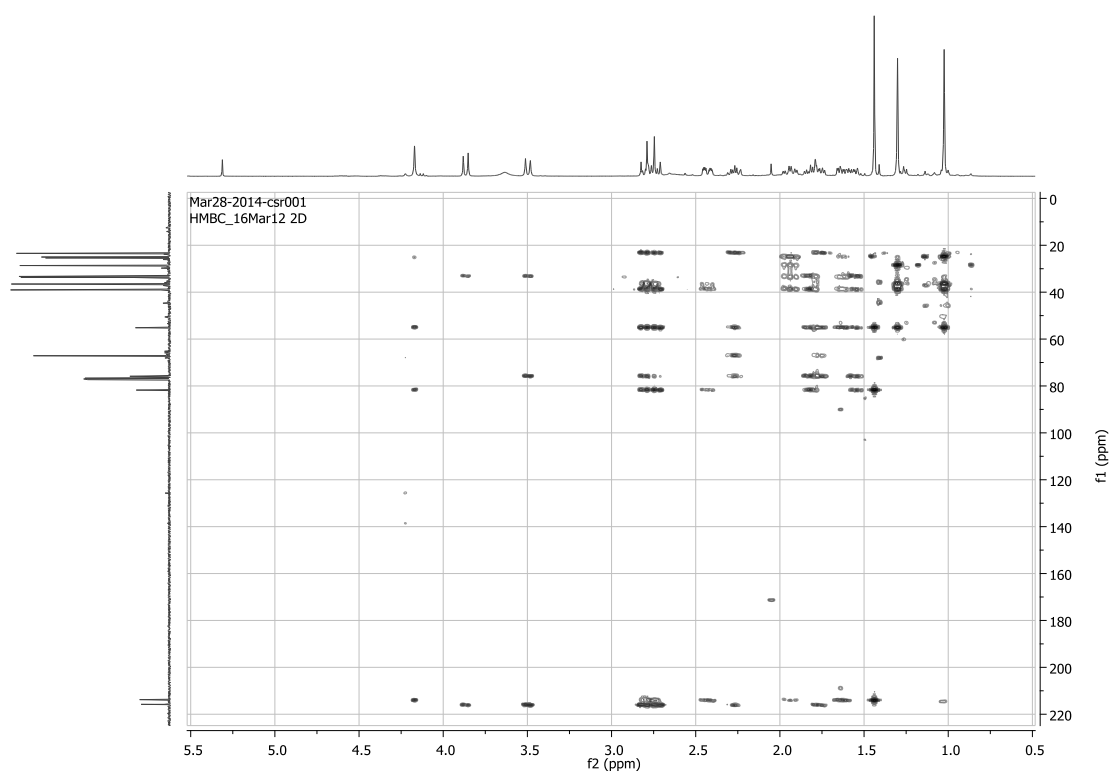

Figure S34. HMBC spectrum (CDCl<sub>3</sub>) of Merulinol F (6).
